# Supplementary material
Source: bioRxiv or medRxiv preprint supplement (https://www.biorxiv.org/highwire/filestream/10179/field_highwire_adjunct_files/0/037937-1.pdf)
Supplement: Supplementary file [file 037937-1.pdf]

**Table 1.** Paired-recording parameters. The distance  $\pm$  error designates the distance between the micropipette tip and the closest electrode on the extracellular probe. The P2P amplitude is the maximum peak-to-peak amplitude of the JTAs across all extracellular channels for each paired recording. AP from bregma indicates the anterior-posterior distance relative to bregma for each pair. The depth is the distance from the brain surface to the cell recorded. This value is calculated by  $Z_{\text{juxta}} - Z_{\text{juxta insertion}}$ . The ADC channel column specifies which ADC channel was used to record juxtacellular activity and the ADC gain represents the amplification factor. Both are important parameters to load the juxtacellular recording. The Juxta threshold column indicates the threshold used for spike detection and the Juxta spikes indicates the corresponding number of detected spikes in the recording. The (x,y,z) Extra and (x,y,z) Juxta are the coordinates from the 'origin' point in the extracellular polytrode (which is depicted in the read me file) and from the tip of the pipette position, respectively. The (x,y,z) Insertion Extra and (x,y,z) Insertion Juxta are the positions of both probes when they touched the brain throughout insertion. These values are relative to the 'zeroing' point that is usually centered at the craniotomy and 1 to 4 mm above the tissue. (n.a. not available)

| Pair-recorded      | Distance ( $\mu\text{m}$ ) | Error ( $\mu\text{m}$ ) | P2P amplitude ( $\mu\text{V}$ ) | AP from bregma ( $\mu\text{m}$ ) | Depth ( $\mu\text{m}$ ) | ADC channel | ADC gain | Juxta threshold (mV) | Juxta spikes | (x,y,z) Extra ( $\mu\text{m}$ ) | (x,y,z) Juxta ( $\mu\text{m}$ ) | (x,y,z) insertion Extra ( $\mu\text{m}$ ) | (x,y,z) insertion Juxta ( $\mu\text{m}$ ) |
|--------------------|----------------------------|-------------------------|---------------------------------|----------------------------------|-------------------------|-------------|----------|----------------------|--------------|---------------------------------|---------------------------------|-------------------------------------------|-------------------------------------------|
| 2014_11_25_Pair3.0 | 55.0                       | 30                      | 420.9                           | -3215.0                          | 1337.5                  | 0           | 100      | 0.8                  | 348          | -184.7, -200.9, -3312.0         | -112.3, -200.9, -3310.6         | -1109.8, -200.9, -2262.9                  | 589.0, -200.9, -1973.1                    |
| 2014_11_25_Pair1.1 | 106.4                      | 30                      | 23.9                            | -3215.0                          | 1268.0                  | 0           | 100      | 1.0                  | 2230         | -184.7, -200.9, -3312.0         | -105.4, -200.9, -3241.1         | -1109.8, -200.9, -2262.9                  | 589.0, -200.9, -1973.1                    |
| 2014_11_25_Pair1.0 | 107.1                      | 30                      | 27.4                            | -3215.0                          | 1268.0                  | 0           | 100      | 0.8                  | 2270         | -167.1, -213.4, -3332.0         | -105.4, -200.9, -3241.1         | -1109.8, -200.9, -2262.9                  | 589.0, -200.9, -1973.1                    |
| 2014_11_25_Pair2.0 | 154.4                      | 30                      | 21.3                            | -3215.0                          | 1246.0                  | 0           | 100      | 0.8                  | 513          | -184.7, -200.9, -3312.0         | -61.4, -200.9, -3219.0          | -1109.8, -200.9, -2262.9                  | 589.0, -200.9, -1973.1                    |
| 2014_03_26_Pair2.1 | 63.4                       | 40                      | 91.1                            | -3561.0                          | 1815.3                  | 1           | 1000     | 1.0                  | 16           | 50.1, -467.9, -4021.0           | 90.4, -468.9, -3968.0           | -959.0, -467.9, -2621.0                   | 547.0, -468.9, -2153.0                    |
| 2014_03_26_Pair2.0 | 90.5                       | 40                      | 62.8                            | -3561.0                          | 1815.3                  | 1           | 1000     | 1.0                  | 150          | 0.01, -467.9, -3965.0           | 90.4, -468.9, -3968.0           | -959.0, -467.9, -2621.0                   | 547.0, -468.9, -2153.0                    |
| 2014_10_17_Pair1.1 | 68.9                       | 30                      | 38.2                            | -3121.0                          | 1256.0                  | 0           | 100      | 1.0                  | 322          | 40.8, 0.0, -2359.2              | 98.1, 0.0, -2321.0              | -861.0, 0.0, -1348.0                      | 902.9, 0.0, -1065.0                       |
| 2014_10_17_Pair1.0 | 68.3                       | 30                      | 36.3                            | -3121.0                          | 1256.0                  | 0           | 100      | 1.0                  | 442          | 0.04, 0.0, -2313.7              | 98.1, 0.0, -2321.0              | -861.0, 0.0, -1348.0                      | 902.9, 0.0, -1065.0                       |
| 2014_03_20_Pair3.0 | 72.7                       | 40                      | 30.4                            | -2800.0                          | 1562.8                  | 1           | 1000     | 1.5                  | 1311         | 47.6, 0.0, -3438.6              | 63.4, 0.0, -3347.8              | -906.0, 0.0, -2365.0                      | 1152.0, 0.0, -1785.0                      |
| 2014_03_20_Pair2.0 | 99.0                       | 40                      | 17.8                            | -2800.0                          | 1543.6                  | 1           | 1000     | 0.5                  | 4480         | 47.6, 0.0, -3438.6              | 81.4, 0.0, -3328.6              | -906.0, 0.0, -2365.0                      | 1152.0, 0.0, -1785.0                      |
| 2014_11_13_Pair1.0 | 93.8                       | 30                      | 22.7                            | -3404.0                          | 1271.7                  | 0           | 100      | 0.5                  | 650          | -52.6, 96.6, -2806.6            | 41.0, 97.1, -2771.7             | -865.0, 94.2, -1897.0                     | 962.3, 55.3, -1500.0                      |
| 2014_10_17_Pair2.0 | 115.8                      | 30                      | 15.0                            | -3121.0                          | 1213.2                  | 0           | 100      | 1.0                  | 771          | 48.1, 0.0, -2367.4              | 123.3, 0.0, -2278.2             | -861.0, 0.0, -1348.0                      | 902.9, 0.0, -1065.0                       |
| 2014_03_20_Pair1.0 | 198.0                      | 40                      | 4.2                             | -2800.0                          | 1468.2                  | 1           | 1000     | 2.0                  | 2555         | 0.1, 0.0, -3379.7               | 153.6, 0.0, -3253.2             | -906.0, 0.0, -2365.0                      | 1152.0, 0.0, -1785.0                      |
| 2014_11_13_Pair3.0 | 193.0                      | 30                      | 6.6                             | -3404.0                          | 1180.3                  | 0           | 100      | 1                    | 2004         | -52.6, 96.6, -2806.6            | 93.2, 97.1, -2680.3             | -865.0, 110.5, -1897.0                    | 962.3, 113.1, -1500.0                     |
| 2014_02_19_Pair1.0 | 164.5                      | 40                      | 2.3                             | -3051.0                          | ~1000                   | 1           | 1000     | 0.5                  | 4379         | -113.3, 0.0, -1225.4            | -22.7, 0.0, -1079.8             | -901.0, 0.0, -266.0                       | n.a.                                      |
| 2014_02_14_Pair1.0 | 394.7                      | 40                      | 6.5                             | -3000.0                          | 1600.0                  | 1           | 1000     | 0.3                  | 1208         | -359.1, -140.2, -1333.6         | 15.5, -90.2, -981.8             | -1224.7, -140.2, -366.7                   | 658.2, -90.2, -159.7                      |
| 2013_12_20_Pair1.0 | 446.0                      | 40                      | 2.8                             | -3066.0                          | ~1600                   | 4           | 1000     | 0.5                  | 3396         | 267.0, -307.0, -1247.0          | 0.0, -307.0, -1604.0            | n.a.                                      | n.a.                                      |
| 2014_10_10_Pair1.0 | 470.9                      | 30                      | 4.4                             | -3206.5                          | 822.1                   | 0           | 100      | 0.5                  | 1607         | -255.6, 89.5, -2238.9           | 232.5, 89.5, -2525.9            | -1296.0, 89.5, -1074.0                    | 1050.0, 89.5, -760.0                      |
| 2015_09_09_Pair7.1 | 120.9                      | 40                      | 21.1                            | 2469.0                           | 1047.8                  | 0           | 100      | 1.0                  | 634          | 408.7, 0.0, -5282.4             | 196.5, 0.0, -4865.0             | -681.9, 0.0, -4063.0                      | 775.1, 0.0, -3817.2                       |
| 2015_09_09_Pair7.0 | 136.2                      | 40                      | 20.7                            | 2469.0                           | 1032.8                  | 0           | 100      | 1.0                  | 1082         | 408.7, 0.0, -5282.4             | 204.0, 0.0, -4850.0             | -681.9, 0.0, -4063.0                      | 775.1, 0.0, -3817.2                       |
| 2015_09_09_Pair6.0 | 176.0                      | 40                      | 23.5                            | 2469.0                           | 995.8                   | 0           | 100      | 1.0                  | 489          | 408.7, 0.0, -5282.4             | 225.0, 0.0, -4813.0             | -681.9, 0.0, -4063.0                      | 775.1, 0.0, -3817.2                       |
| 2015_09_09_Pair4.0 | 166.0                      | 40                      | 18.1                            | 2469.0                           | 1211.5                  | 0           | 100      | 1.0                  | 1899         | 408.7, 0.0, -5282.4             | 266.1, 0.0, -4875.1             | -681.9, 0.0, -4063.0                      | 934.0, 0.0, -3663.6                       |
| 2015_09_04_Pair5.0 | 96.1                       | 40                      | 30.8                            | -2951.0                          | 1185.5                  | 0           | 100      | -1.0                 | 185          | 494.5, 0.0, -4920.0             | 331.5, 0.0, -4594.8             | -807.6, 0.0, -3459.2                      | 984.0, 0.0, -3409.3                       |
| 2015_09_04_Pair6.0 | 88.7                       | 40                      | 7.0                             | -2951.0                          | 1059.6                  | 0           | 100      | 0.3                  | 636          | 494.5, 0.0, -4920.0             | 161.4, 47.2, -4415.2            | -807.6, 0.0, -3459.2                      | 746.6, 47.2, -3355.6                      |
| 2015_09_04_Pair6.1 | 88.7                       | 40                      | 5.0                             | -2951.0                          | 1059.6                  | 0           | 100      | 1.0                  | 1172         | 494.5, 0.0, -4920.0             | 161.4, 47.2, -4415.2            | -807.6, 0.0, -3459.2                      | 746.6, 47.2, -3355.6                      |
| 2015_09_03_Pair6.0 | 153.3                      | 40                      | 24.1                            | -2456.0                          | 1063.2                  | 0           | 100      | 1.0                  | 3329         | 487.2, 0.0, -5333.3             | 179.0, 0.0, -4833.2             | -612.5, 0.0, -4103.0                      | 808.0, 0.0, -3790.0                       |
| 2015_09_03_Pair6.1 | 82.4                       | 40                      | 19.7                            | -2456.0                          | 1043.2                  | 0           | 100      | 2.0                  | 2876         | 487.2, 0.0, -5333.3             | 166.0, 0.0, -4853.2             | -612.5, 0.0, -4103.0                      | 808.0, 0.0, -3790.0                       |
| 2015_09_03_Pair9.0 | 11.5                       | 40                      | 416.3                           | -2456.0                          | 1152.8                  | 0           | 100      | -0.2                 | 5007         | 487.2, 0.0, -5333.3             | 266.2, 20.0, -5075.2            | -612.5, 0.0, -4103.0                      | 991.5, 20.0, -3922.4                      |
| 2015_08_28_Pair2.0 | 116.9                      | 40                      | 9.7                             | -2443.0                          | 1125.2                  | 0           | 100      | 1.0                  | 472          | 299.1, -119.4, -4588.2          | 362.9, -94.6, -4485.6           | -725.0, -119.4, -3503.1                   | 910.0, -94.6, -3463.0                     |
| 2015_08_28_Pair2.1 | 116.9                      | 40                      | 10.6                            | -2443.0                          | 1125.2                  | 0           | 100      | 1.0                  | 1053         | 299.1, -119.4, -4588.2          | 362.9, -94.6, -4485.6           | -725.0, -119.4, -3503.1                   | 910.0, -94.6, -3463.0                     |
| 2015_08_28_Pair2.2 | 104.0                      | 40                      | 11.7                            | -2443.0                          | 1034.0                  | 0           | 100      | 1.0                  | 639          | 299.1, -119.4, -4588.2          | 356.2, -94.6, -4497.0           | -725.0, -119.4, -3503.1                   | 910.0, -94.6, -3463.0                     |
| 2015_08_28_Pair9.0 | 127.7                      | 40                      | 8.2                             | -2443.0                          | 917.0                   | 0           | 100      | 1.0                  | 3181         | 299.1, -119.4, -4588.2          | 347.4, -119.4, -4451.7          | -725.0, -119.4, -3503.1                   | 820.8, -119.4, -3534.7                    |
| 2015_08_21_Pair3.1 | 132.9                      | 40                      | 19.4                            | -2984.0                          | 1286.0                  | 0           | 100      | 0.4                  | 4466         | 493.0, 33.3, -4722.0            | 437.0, 33.4, -4462.0            | -706.0, 33.3, -3381.4                     | 1160.6, 33.4, -3176.0                     |
| 2015_08_21_Pair3.0 | 132.8                      | 40                      | 19.4                            | -2984.0                          | 1286.0                  | 0           | 100      | 0.4                  | 8117         | 469.0, 33.3, -4695.6            | 437.0, 33.4, -4462.0            | -706.0, 33.3, -3381.4                     | 1160.6, 33.4, -3176.0                     |
